# Supplementary material for: Comprehensive analysis of HIV reservoirs in elite controllers
Source: JCI journal article supplement (doi:10.1172/jci165446), 2023-01-31
Supplement: sd1 [file 1]

301 Moved Permanently

# Moved Permanently

The document has moved here.
